# Supplementary material for: Phosphorylation State Dictates Bacterial Stressosome Assembly and Function
Source: Research Square preprint supplement (doi:10.21203/rs.3.rs-6735924/v1), 2025-05-30
Supplement: Supplementary file [file 12239f5e17cd1121eeed7153.pdf]

**Supplementary Table 1. Interface Description of Two Units in RsbR<sub>T209E</sub>ST Assembly**

| Interface     | Unit 1 (a-d)                                          |                                                       | Unit 2 (e-h)                                          |                                                      |
|---------------|-------------------------------------------------------|-------------------------------------------------------|-------------------------------------------------------|------------------------------------------------------|
|               | Hydrogen Bonding                                      | Salt Bridges                                          | Hydrogen Bonding                                      | Salt Bridges                                         |
| Interface i   | RsbR <sub>1</sub> :E195 ::<br>RsbR <sub>2</sub> :K260 | RsbR <sub>1</sub> :R223 ::<br>RsbR <sub>2</sub> :D250 | RsbS <sub>2</sub> :K70 ::<br>RsbS <sub>3</sub> :S101  | No salt bridges                                      |
|               |                                                       | RsbR <sub>1</sub> :E195 ::<br>RsbR <sub>2</sub> :K260 | RsbS <sub>3</sub> :L71 ::<br>RsbS <sub>3</sub> :S101  |                                                      |
|               |                                                       |                                                       | RsbS <sub>3</sub> :G73 ::<br>RsbS <sub>3</sub> :S101  |                                                      |
| Interface ii  | RsbR <sub>1</sub> :E237 ::<br>RsbS <sub>1</sub> :H37  | RsbR <sub>1</sub> :E237 ::<br>RsbS <sub>1</sub> :H37  | RsbR <sub>3</sub> :R223 ::<br>RsbS <sub>2</sub> :S101 | No salt bridges                                      |
|               | RsbR <sub>1</sub> :N256 ::<br>RsbS <sub>1</sub> :S40  |                                                       | RsbR <sub>3</sub> :L224 ::<br>RsbS <sub>2</sub> :S101 |                                                      |
| Interface iii | RsbS <sub>1</sub> :F96 ::<br>RsbR <sub>2</sub> :R223  | RsbR <sub>3</sub> :E248 ::<br>RsbS <sub>3</sub> :S67  | No salt bridges                                       | RsbR <sub>3</sub> :E248 ::<br>RsbS <sub>3</sub> :K70 |
|               | RsbS <sub>1</sub> :S101 ::<br>RsbR <sub>2</sub> :L224 |                                                       |                                                       |                                                      |
